# Supplementary material for: Longer screen time utilization is associated with the polygenic risk for Attention-deficit/hyperactivity disorder with mediation by brain white matter microstructure
Source: PubMed Central journal article supplement — eBioMedicine. 2022 May 1;80:104039. doi: 10.1016/j.ebiom.2022.104039 (PMC9079003; doi:10.1016/j.ebiom.2022.104039), 2022-05-01
Supplement: mmc1.pdf [file mmc1.pdf]

## Supplementary Information

### **Longer screen time utilization is associated with the polygenic risk for Attention-deficit/hyperactivity disorder with mediation by brain white matter microstructure**

Anyi Yang<sup>1,#</sup>, Edmund T. Rolls, PhD<sup>1,2,3,4,#</sup>, Guiying Dong<sup>1,2</sup>, Jingnan Du, PhD<sup>1,2</sup>, Yuzhu Li<sup>1,2</sup>, Jianfeng Feng, PhD<sup>1,2,3,5,6,7</sup>, Wei Cheng, PhD<sup>1,2,5,\*</sup> and Xing-Ming Zhao, PhD<sup>1,2,6,8,\*</sup>

#### **Author affiliations:**

- 1 Institute of Science and Technology for Brain-Inspired Intelligence, Fudan University, Shanghai, China.
- 2 Key Laboratory of Computational Neuroscience and Brain-Inspired Intelligence, Ministry of Education, Shanghai, China.
- 3 Department of Computer Science, University of Warwick, Coventry, UK.
- 4 Oxford Centre for Computational Neuroscience, Oxford, UK.
- 5 Fudan ISTBI—ZJNU Algorithm Centre for Brain-inspired Intelligence, Zhejiang Normal University, Jinhua, China.
- 6 MOE Frontiers Center for Brain Science, Fudan University, Shanghai, China.
- 7 Zhangjiang Fudan International Innovation Center, Shanghai, China.
- 8 Research Institute of Intelligent Complex Systems, Fudan University, Shanghai, China.

# Anyi Yang and Edmund T. Rolls contributed equally to the study.

#### **\* Corresponding authors:**

Associate Professor Wei Cheng, Institute of Science and Technology for Brain-Inspired Intelligence, Fudan University, Shanghai 200433, China. Tel: 86-2165-64837. E-mail address: wcheng.fdu@gmail.com;

Professor Xing-Ming Zhao, Institute of Science and Technology for Brain-Inspired Intelligence, Fudan University, Shanghai 200433, China. Tel: 86-2165-64837. E-mail address: xmzhao@fudan.edu.cn.

This PDF file includes:

- Figure S1 to Figure S5 (Page 2-6)
- Table S1 to Table S9 (Page 7-18)
- Supplementary Information References (Page 19)

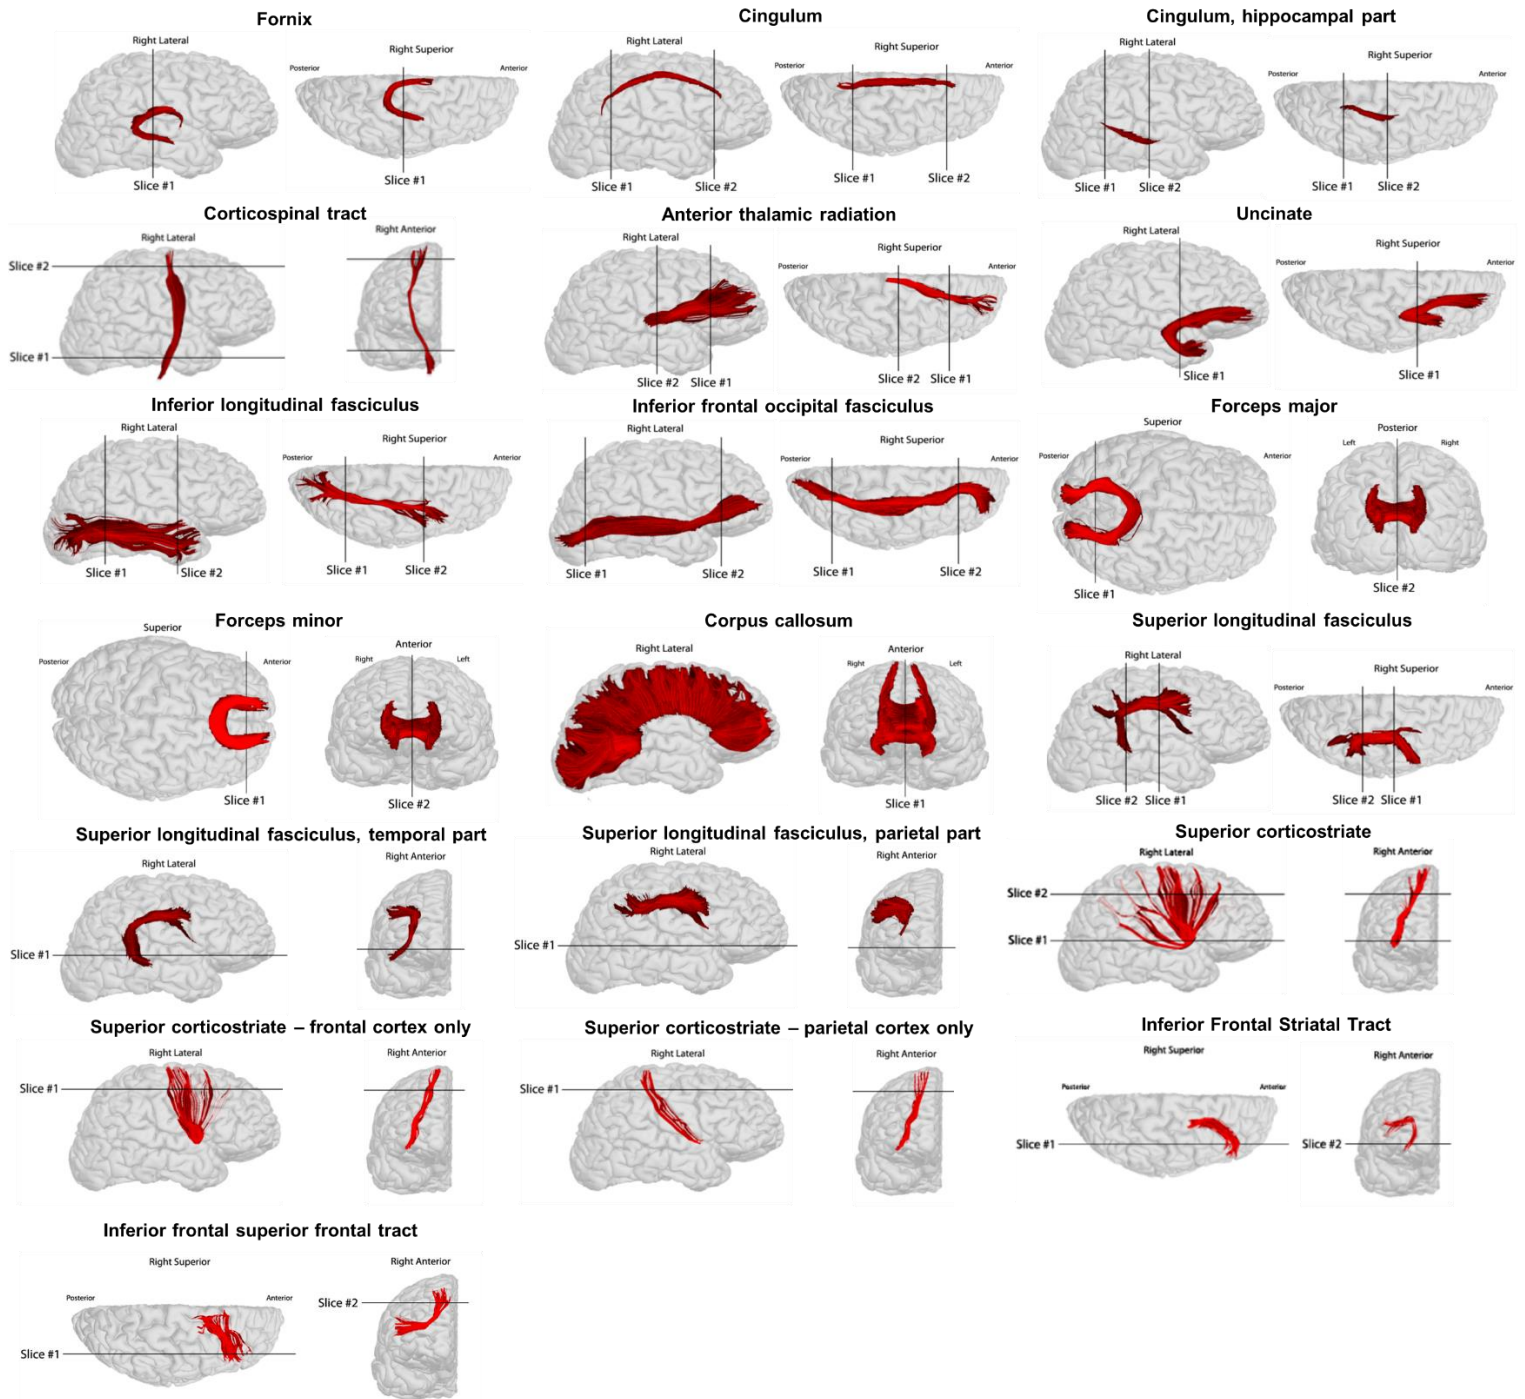

**Figure S1:** Visualization of each fiber tract in Atlas Track. The picture is directly derived from the manual of Atlas Track, and the slices on each fiber are not shown for brevity. More details can be found in the manual of Atlas Track (<https://www.nitrc.org/projects/atlastrack/>).<sup>1</sup>

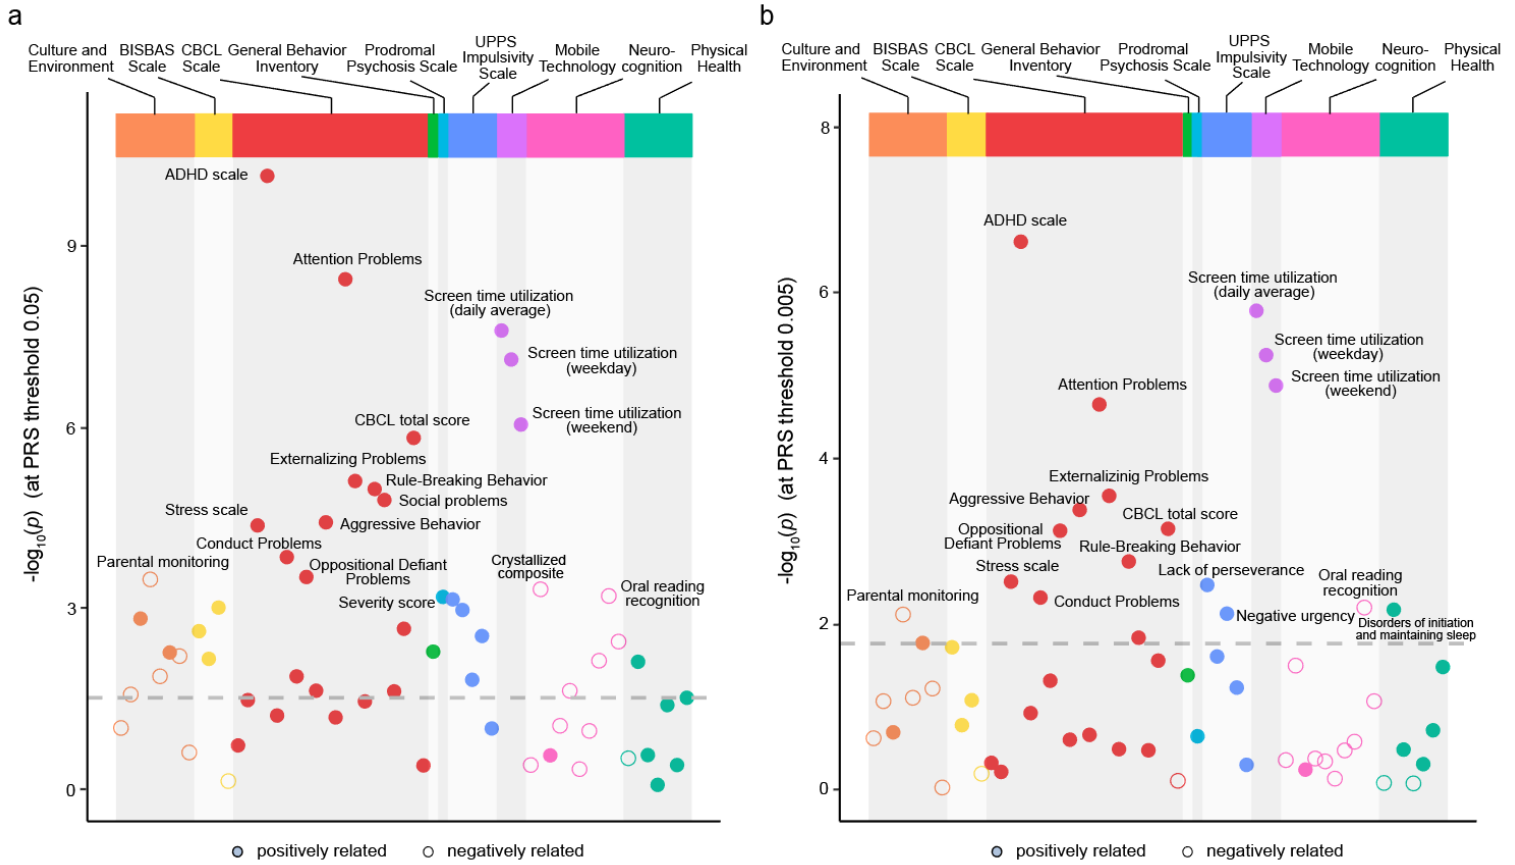

**Figure S2:** Associations between behavioral assessments and PRS<sup>ADHD</sup> at PRS threshold neighboring 0.01: **(a)** 0.05; **(b)** 0.005. Each Manhattan plot illustrates the association between PRS<sup>ADHD</sup> and all the behavioral assessments shown in Table S3. A point above the grey dotted line denotes that this assessment is significantly correlated with PRS<sup>ADHD</sup> (FDR < 0.05). The ADHD scale, daily average screen time utilization (denoted as STU in default in our study), Attention Problems scale, and Externalizing Problems scale always reach the top several non-redundant assessments which were significantly correlated with PRS<sup>ADHD</sup>.

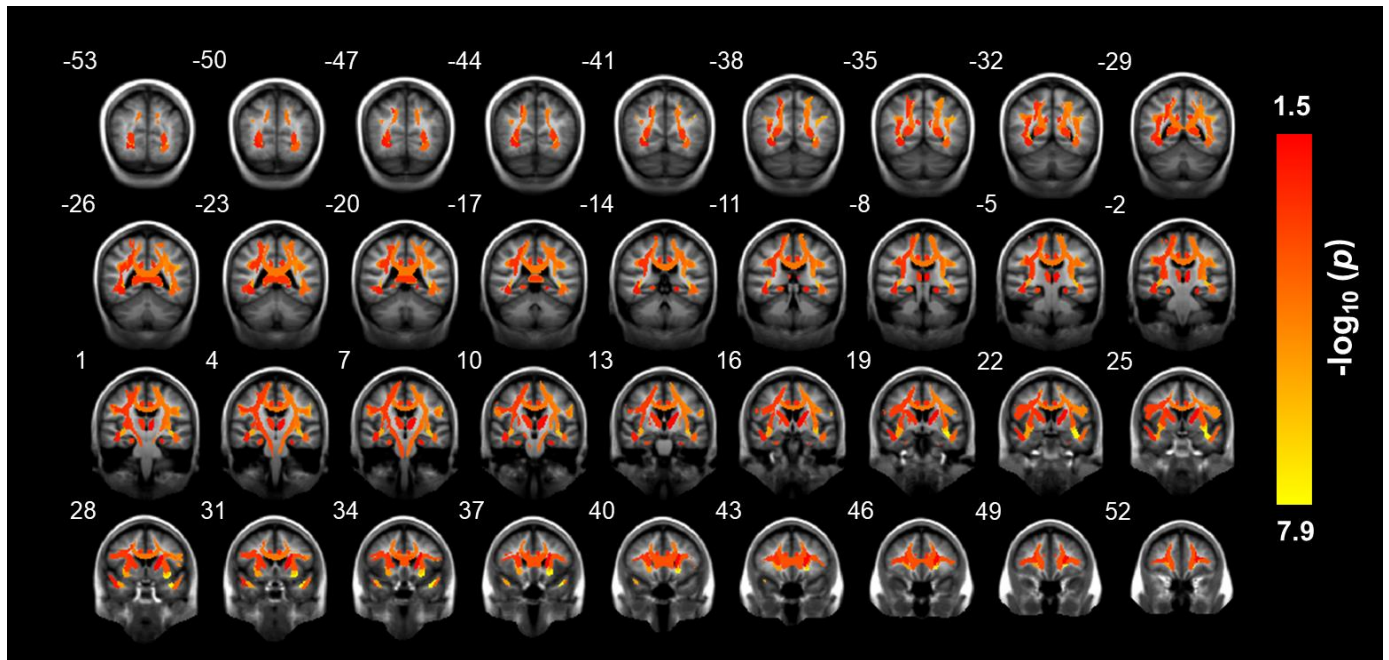

**Figure S3:** Significant brain tracts analyzed with DTI (FDR < 0.05) associated with the ADHD scale. The number above each brain anatomical section is the MNI coordinate for the selected plane.

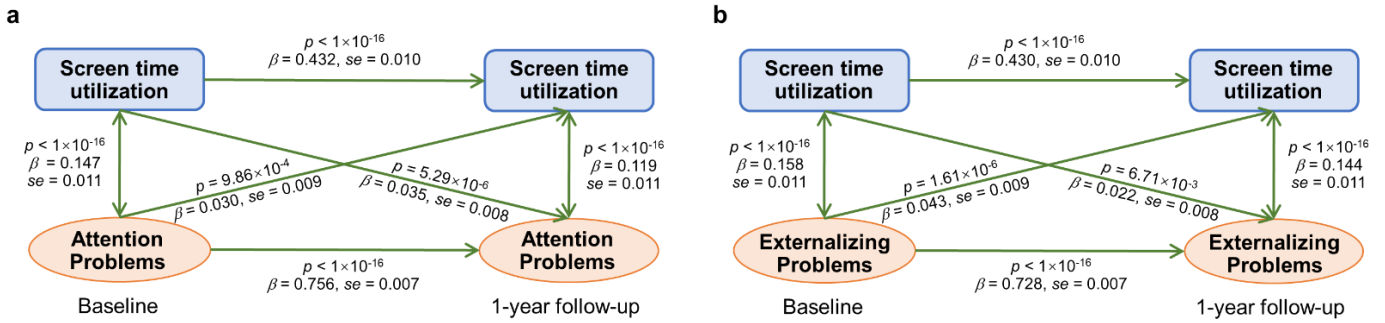

**Figure S4:** The longitudinal analyses between **(a)** STU and the Attention Problems scale at baseline and 1-year follow-up; **(b)** STU and the Externalizing Problems scale at baseline and 1-year follow-up.

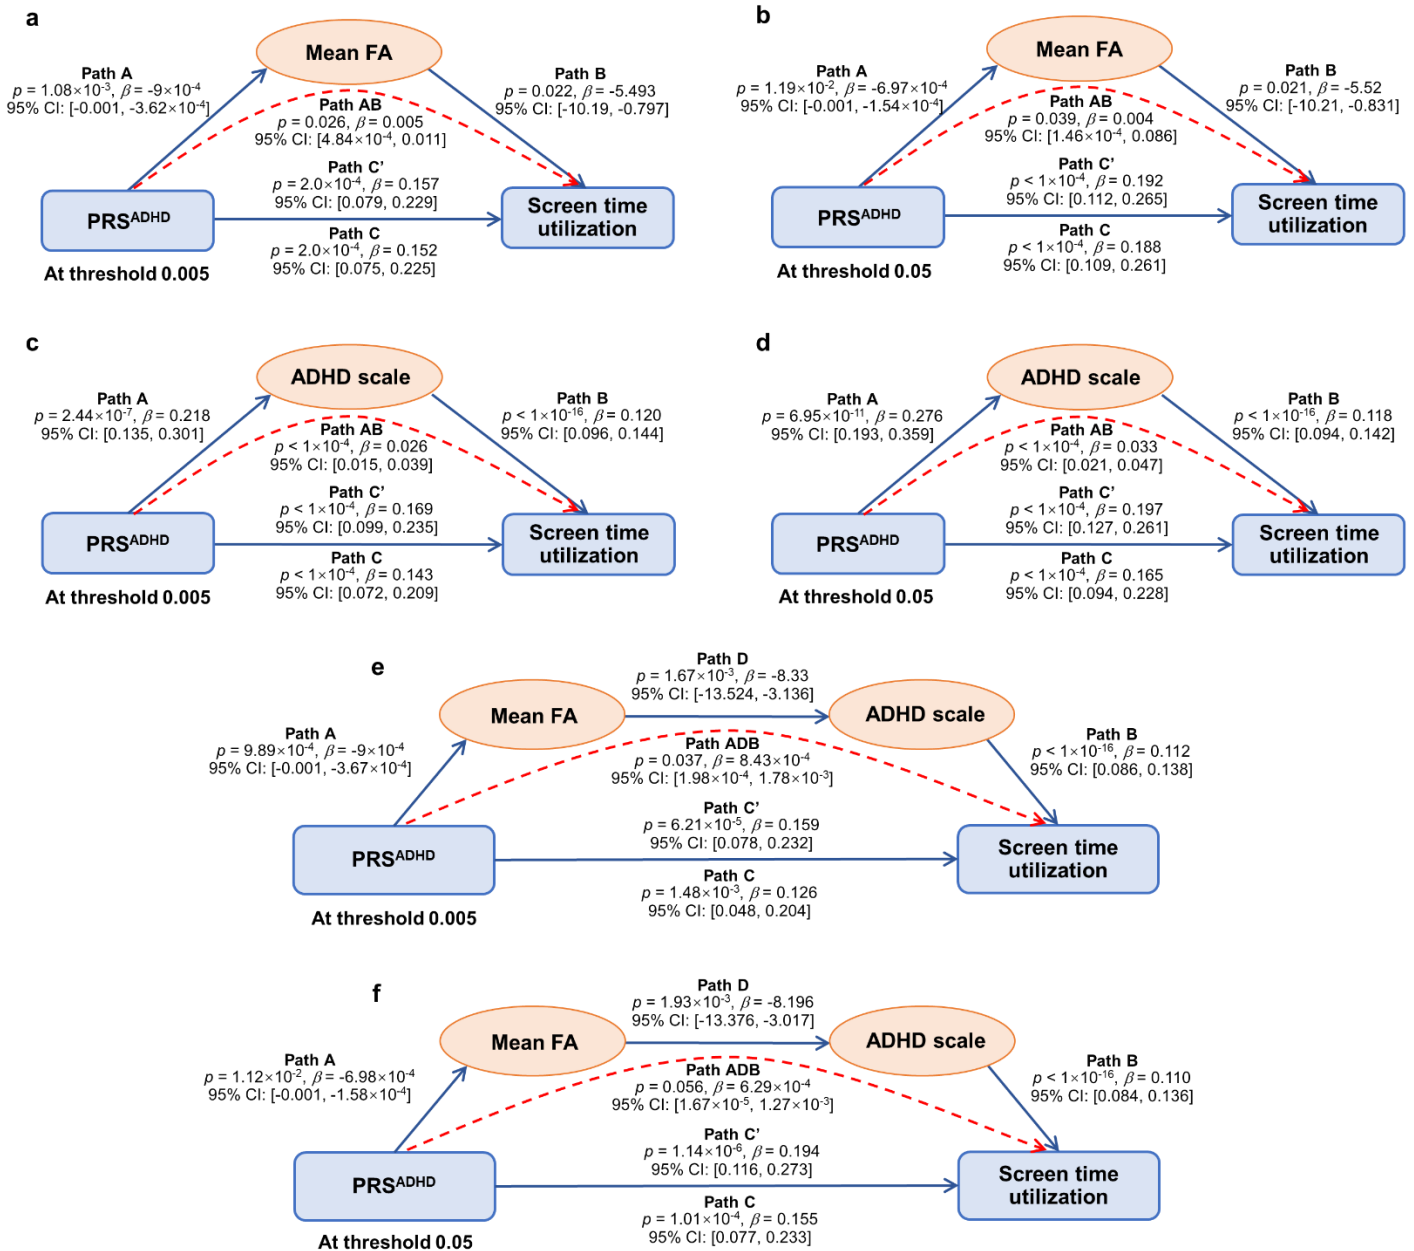

**Figure S5: The mediation analyses at neighboring PRS threshold of 0.01.** (a) Mediation analysis between PRS<sup>ADHD</sup> at threshold 0.05 and STU through mean FA value of regional findings shown in Figure 3c; (b) Mediation analysis between PRS<sup>ADHD</sup> at threshold 0.005 and STU through mean FA value of regional findings shown in Figure 3c; (c) Mediation analysis between PRS<sup>ADHD</sup> at threshold 0.005 and STU through the ADHD scale; (d) Mediation analysis between PRS<sup>ADHD</sup> at threshold 0.05 and STU through the ADHD scale; (e) Serial mediation analysis between PRS<sup>ADHD</sup> at threshold 0.005 and STU through mean FA value of white matter tracts shown in Figure 3c and the ADHD scale (sequentially). (f) Serial mediation analysis between PRS<sup>ADHD</sup> at threshold 0.05 and STU through mean FA value of white matter tracts shown in Figure 3c and the ADHD scale (sequentially). Path C shows the association between PRS<sup>ADHD</sup> and STU when mediators are not taken into account. Path C' shows the association between PRS<sup>ADHD</sup> and STU when mediators are taken into account. The mediation relationship is labelled with a red dotted line in (a-f).

**Table S1:** The connected brain regions of each individual fiber tract in Atlas Track.

| <b>Fibers</b>                             | <b>Connection</b>                                             |
|-------------------------------------------|---------------------------------------------------------------|
| fornix                                    | hippocampus & mammillary nuclei of hypothalamus               |
| cingulate (cingulum)                      | cingulate gyrus & entorhinal cortex (cingulate portion)       |
| cingulum (parahippocampal)                | cingulate gyrus & entorhinal cortex (parahippocampal portion) |
| corticospinal tract or pyramidal tract    | motor cortex & spinal cord                                    |
| anterior thalamic radiations              | thalamus & frontal lobe                                       |
| uncinate fasciculus                       | inferior frontal lobe & anterior temporal lobe                |
| inferior longitudinal fasciculus          | occipital lobe & temporal lobe                                |
| inferior fronto-occipital fasciculus      | occipital lobe & frontal lobe                                 |
| forceps major                             | left occipital cortex & right occipital cortex                |
| forceps minor                             | left prefrontal cortex & right prefrontal cortex              |
| corpus callosum                           | left cortex & right cortex                                    |
| superior longitudinal fasciculus          | temporal and parietal lobes & frontal lobe                    |
| temporal superior longitudinal fasciculus | temporal lobe & frontal lobe                                  |
| parietal superior longitudinal fasciculus | parietal lobe & frontal lobe                                  |
| superior corticostriate                   | superior cortex & striatum                                    |
| superior corticostriate (frontal)         | superior frontal cortex & striatum                            |
| superior corticostriate (parietal)        | superior parietal cortex & striatum                           |
| inferior frontal-striatal tract           | inferior frontal cortex & striatum                            |
| inferior frontal superior frontal tract   | inferior frontal cortex & superior frontal cortex             |

**Table S2:** The demographic characteristics of the ABCD European samples (genetic\_af\_european > 0.95).

| <b>Basic information</b>                                              |                                                                     |                                                                   |                                                                      |                                                                    |
|-----------------------------------------------------------------------|---------------------------------------------------------------------|-------------------------------------------------------------------|----------------------------------------------------------------------|--------------------------------------------------------------------|
| Age (month)                                                           | Gender (Male/Female)                                                | BMI                                                               | Parents income                                                       | Parents education                                                  |
| 119.2 ± 7.36                                                          | 2473/2200                                                           | 18.62 ± 3.41                                                      | 8.13 ± 1.64                                                          | 17.54 ± 2                                                          |
| Puberty                                                               | Race (White/Black/Hispanic/Asian/Other)                             |                                                                   |                                                                      |                                                                    |
| 2 ± 0.73                                                              | 4490/1/72/0/110                                                     |                                                                   |                                                                      |                                                                    |
| <b>Screen time utilization measurement</b>                            |                                                                     |                                                                   |                                                                      |                                                                    |
| Screen Time Youth Weekday Sum (stq_y_ss_weekday)                      | Screen Time Youth Weekend Sum (stq_y_ss_weekend)                    | Screen Time Youth daily average (stq_y_ss_ave_daily)              |                                                                      |                                                                    |
| 2.87 ± 2.58                                                           | 4.03 ± 3.09                                                         | 3.2 ± 2.57                                                        |                                                                      |                                                                    |
| <b>Psychiatric problem measurement</b>                                |                                                                     |                                                                   |                                                                      |                                                                    |
| Anxious/Depressed CBCL Syndrome Scale (cbcl_scr_syn_anxdep)           | Withdrawn/Depressed CBCL Syndrome Scale (cbcl_scr_syn_withdep)      | Somatic Complaints CBCL Syndrome Scale (cbcl_scr_syn_somatic)     | Social Problems CBCL Syndrome Scale (cbcl_scr_syn_social)            | Thought Problems CBCL Syndrome Scale (cbcl_scr_syn_thought)        |
| 2.68 ± 3.11                                                           | 0.97 ± 1.62                                                         | 1.55 ± 1.9                                                        | 1.49 ± 2.18                                                          | 1.76 ± 2.21                                                        |
| Attention Problems CBCL Syndrome Scale (cbcl_scr_syn_attention)       | Rule-Breaking Behavior CBCL Syndrome Scale (cbcl_scr_syn_rulebreak) | Aggressive Behavior CBCL Syndrome Scale (cbcl_scr_syn_aggressive) | Internalizing Problems CBCL Syndrome Scale (cbcl_scr_syn_internal)   | Externalizing Problems CBCL Syndrome Scale (cbcl_scr_syn_external) |
| 2.91 ± 3.41                                                           | 1.05 ± 1.68                                                         | 3.18 ± 4.1                                                        | 5.2 ± 5.42                                                           | 4.23 ± 5.45                                                        |
| Total Problems CBCL Syndrome Scale (cbcl_scr_syn_totprob)             | Depressive Problems CBCL DSM5 Scale (cbcl_scr_dsm5_depress)         | Anxiety Disorder CBCL DSM5 Scale (cbcl_scr_dsm5_anxdisord)        | Somatic Problems CBCL DSM5 Scale (cbcl_scr_dsm5_somaticpr)           | ADHD CBCL DSM5 Scale (cbcl_scr_dsm5_adhd)                          |
| 18.04 ± 17.04                                                         | 1.29 ± 1.97                                                         | 2.14 ± 2.43                                                       | 1.14 ± 1.5                                                           | 2.55 ± 2.94                                                        |
| Oppositional Defiant Problems CBCL DSM5 Scale (cbcl_scr_dsm5_opposit) | Conduct Problems CBCL DSM5 Scale (cbcl_scr_dsm5_conduct)            | Sluggish Cognitive Tempo CBCL Scale2007 Scale (cbcl_scr_07_sct)   | Obsessive-Compulsive Problems CBCL Scale2007 Scale (cbcl_scr_07_ocd) | Stress Problems CBCL Scale2007 Scale (cbcl_scr_07_stress)          |
| 1.8 ± 2                                                               | 1.12 ± 2.14                                                         | 0.53 ± 0.96                                                       | 1.47 ± 1.82                                                          | 2.91 ± 3.26                                                        |

Note: The detail information of how the measurement can be found on [https://nda.nih.gov/data\\_dictionary.html](https://nda.nih.gov/data_dictionary.html).



**Table S3:** The average proportion of phenotypic variance explained by PRS<sup>ADHD</sup> at different thresholds.  $R^2$  denotes the proportion of the phenotype variance explained by PRS<sup>ADHD</sup>. The  $R^2$  was averaged among the measurements focused in this study, including 42 DTI FA metrics, the ADHD scale and STU. The PRS<sup>ADHD</sup> at threshold 0.01 captured the largest average  $R^2$ , and was selected to illustrate our main results.

| <b>PRS threshold</b> | <b>Average <math>R^2</math></b> |
|----------------------|---------------------------------|
| 0.5                  | 0.157%                          |
| 0.1                  | 0.157%                          |
| 0.05                 | 0.148%                          |
| 0.01                 | 0.233%                          |
| 0.005                | 0.129%                          |
| 0.001                | 0.119%                          |
| 0.0005               | 0.057%                          |
| 0.0001               | 0.029%                          |
| $5 \times 10^{-5}$   | 0.029%                          |
| $5 \times 10^{-8}$   | 0.014%                          |

**Table S4:** The behavior assessments used in this study from the ABCD.

| Scale                                                                         | ABCD ID                        | ABCD name                                          | File name        |
|-------------------------------------------------------------------------------|--------------------------------|----------------------------------------------------|------------------|
| <i>Mental Health</i>                                                          |                                |                                                    |                  |
| Behavioral inhibition and behavioral activation (BISBAS scale) – youth report | bis_y_ss_bas_drive             | BIS/BAS: BAS drive                                 | abcd_mhy02.txt   |
| Behavioral inhibition and behavioral activation (BISBAS scale) – youth report | bis_y_ss_bas_fs                | BIS/BAS: BAS Fun Seeking                           | abcd_mhy02.txt   |
| Behavioral inhibition and behavioral activation (BISBAS scale) – youth report | bis_y_ss_bas_rr                | BIS/BAS: BAS Reward Responsiveness                 | abcd_mhy02.txt   |
| Behavioral inhibition and behavioral activation (BISBAS scale) – youth report | bis_y_ss_bis_sum               | BIS/BAS: BIS Sum                                   | abcd_mhy02.txt   |
| Child behavior checklist (CBCL) - caregiver report                            | cbcl_scr_07_ocd_r              | Obsessive-Compulsive Problems CBCL Scale2007 Scale | abcd_cbcls01.txt |
| Child behavior checklist (CBCL) - caregiver report                            | cbcl_scr_07_sct_r              | Sluggish Cognitive Tempo CBCL Scale2007 Scale      | abcd_cbcls01.txt |
| Child behavior checklist (CBCL) - caregiver report                            | cbcl_scr_07_stress_r           | Stress CBCL Scale2007 Scale                        | abcd_cbcls01.txt |
| Child behavior checklist (CBCL) - caregiver report                            | cbcl_scr_dsm5_adhd_r           | ADHD CBCL DSM5 Scale                               | abcd_cbcls01.txt |
| Child behavior checklist (CBCL) - caregiver report                            | cbcl_scr_dsm5_anxdisord_r      | Anxiety Disorder CBCL DSM5 Scale                   | abcd_cbcls01.txt |
| Child behavior checklist (CBCL) - caregiver report                            | cbcl_scr_dsm5_conduct_r        | Conduct Problems CBCL DSM5 Scale                   | abcd_cbcls01.txt |
| Child behavior checklist (CBCL) - caregiver report                            | cbcl_scr_dsm5_depress_r        | Depressive Problems CBCL DSM5 Scale                | abcd_cbcls01.txt |
| Child behavior checklist (CBCL) - caregiver report                            | cbcl_scr_dsm5_opposit_r        | Oppositional Defiant Problems CBCL DSM5 Scale      | abcd_cbcls01.txt |
| Child behavior checklist (CBCL) - caregiver report                            | cbcl_scr_dsm5_somaticpr_r      | Somatic Problems CBCL DSM5 Scale                   | abcd_cbcls01.txt |
| Child behavior checklist (CBCL) - caregiver report                            | cbcl_scr_syn_aggressive_r      | Aggressive Behavior CBCL Syndrome Scale            | abcd_cbcls01.txt |
| Child behavior checklist (CBCL) - caregiver report                            | cbcl_scr_syn_anxdep_r          | Anxious/Depressed CBCL Syndrome Scale              | abcd_cbcls01.txt |
| Child behavior checklist (CBCL) - caregiver report                            | cbcl_scr_syn_attention_r       | Attention Problems CBCL Syndrome Scale             | abcd_cbcls01.txt |
| Child behavior checklist (CBCL) - caregiver report                            | cbcl_scr_syn_external_r        | Externalizing Problems CBCL Syndrome Scale         | abcd_cbcls01.txt |
| Child behavior checklist (CBCL) - caregiver report                            | cbcl_scr_syn_internal_r        | Internalizing Problems CBCL Syndrome Scale         | abcd_cbcls01.txt |
| Child behavior checklist (CBCL) - caregiver report                            | cbcl_scr_syn_rulebreak_r       | Rule-Breaking Behavior CBCL Syndrome Scale         | abcd_cbcls01.txt |
| Child behavior checklist (CBCL) - caregiver report                            | cbcl_scr_syn_social_r          | Social Problems CBCL Syndrome Scale                | abcd_cbcls01.txt |
| Child behavior checklist (CBCL) - caregiver report                            | cbcl_scr_syn_somatic_r         | Somatic Complaints CBCL Syndrome Scale             | abcd_cbcls01.txt |
| Child behavior checklist (CBCL) - caregiver report                            | cbcl_scr_syn_thought_r         | Thought Problems CBCL Syndrome Scale               | abcd_cbcls01.txt |
| Child behavior checklist (CBCL) - caregiver report                            | cbcl_scr_syn_totprob_r         | Total Problems CBCL Syndrome Scale                 | abcd_cbcls01.txt |
| Child behavior checklist (CBCL) - caregiver report                            | cbcl_scr_syn_withdep_r         | Withdrawn/Depressed CBCL Syndrome Scale            | abcd_cbcls01.txt |
| General behavior inventory – caregiver report                                 | pgbi_p_ss_score                | Parent General Behavior Inventory SUM              | abcd_mhp02.txt   |
| Prodromal psychosis scale (PQ-B) – youth report                               | pps_y_ss_severity_score        | Prodromal Psychosis: Severity Score Sum            | abcd_mhy02.txt   |
| UPPS impulsivity scale – youth report                                         | upps_y_ss_lack_of_perseverance | UPPS: Lack of Perseverance (GSSF)                  | abcd_mhy02.txt   |

|                                             |                              |                                                                                   |                  |
|---------------------------------------------|------------------------------|-----------------------------------------------------------------------------------|------------------|
| UPPS impulsivity scale – youth report       | upps_y_ss_lack_of_planning   | UPPS-P for Children Short Form (ABCD-version), Lack of Planning                   | abcd_mhy02.txt   |
| UPPS impulsivity scale – youth report       | upps_y_ss_negative_urgency   | UPPS-P for Children Short Form (ABCD-version), Negative Urgency                   | abcd_mhy02.txt   |
| UPPS impulsivity scale – youth report       | upps_y_ss_positive_urgency   | UPPS-P for Children Short Form (ABCD-version), Positive Urgency                   | abcd_mhy02.txt   |
| UPPS impulsivity scale – youth report       | upps_y_ss_sensation_seeking  | UPPS-P for Children Short Form (ABCD-version), Sensation Seeking                  | abcd_mhy02.txt   |
| <b>Neurocognition</b>                       |                              |                                                                                   |                  |
| NIH Toolbox                                 | nihtbx_cardsort_uncorrected  | NIH Toolbox Dimensional Change Card Sort Test Ages 8-11 v2.0                      | abcd_tbss04.txt  |
| NIH Toolbox                                 | nihtbx_cryst_uncorrected     | Crystallized Composite                                                            | abcd_tbss09.txt  |
| NIH Toolbox                                 | nihtbx_flanker_uncorrected   | NIH Toolbox Flanker Inhibitory Control and Attention Test Ages 8-11 v2.0          | abcd_tbss02.txt  |
| NIH Toolbox                                 | nihtbx_fluidcomp_uncorrected | Cognition Fluid Composite                                                         | abcd_tbss08.txt  |
| NIH Toolbox                                 | nihtbx_list_uncorrected      | NIH Toolbox List Sorting Working Memory Test Age 7+ v2.0                          | abcd_tbss03.txt  |
| NIH Toolbox                                 | nihtbx_pattern_uncorrected   | NIH Toolbox Pattern Comparison Processing Speed Test Age 7+ v2.0                  | abcd_tbss05.txt  |
| NIH Toolbox                                 | nihtbx_picture_uncorrected   | NIH Toolbox Picture Sequence Memory Test Age 8+ Form A v2.0                       | abcd_tbss06.txt  |
| NIH Toolbox                                 | nihtbx_picvocab_uncorrected  | NIH Toolbox Picture Vocabulary Test Age 3+ v2.0                                   | abcd_tbss01.txt  |
| NIH Toolbox                                 | nihtbx_reading_uncorrected   | NIH Toolbox Oral Reading Recognition Test Age 3+ v2.0                             | abcd_tbss07.txt  |
| NIH Toolbox                                 | nihtbx_totalcomp_uncorrected | Cognition Total Composite Score                                                   | abcd_tbss10.txt  |
| <b>Culture and Environment</b>              |                              |                                                                                   |                  |
| ABCD Sum Scores Culture & Environment Youth | crpbi_y_ss_caregiver         | CRPBI - Acceptance Subscale Mean of Report by Secondary Caregiver by youth        | abcd_sscey01.txt |
| ABCD Sum Scores Culture & Environment Youth | crpbi_y_ss_parent            | CRPBI - Acceptance Subscale Mean of Report by Parent Completing Protocol by youth | abcd_sscey01.txt |
| ABCD Sum Scores Culture & Environment Youth | fes_y_ss_fc                  | Conflict Subscale from the Family Environment Scale Sum of Youth Report           | abcd_sscey01.txt |
| ABCD Sum Scores Culture & Environment Youth | pmq_y_ss_mean                | Parental Monitoring: Mean                                                         | abcd_sscey01.txt |
| ABCD Sum Scores Culture & Environment Youth | psb_y_ss_mean                | Prosocial Behavior Subscale Mean of Youth Self Report                             | abcd_sscey01.txt |
| ABCD Sum Scores Culture & Environment Youth | srpf_y_ss_dfs                | SRPF School Disengagement Subscale, Sum                                           | abcd_sscey01.txt |
| ABCD Sum Scores Culture & Environment Youth | srpf_y_ss_iiss               | SRPF School Involvement Subscale, Sum                                             | abcd_sscey01.txt |
| ABCD Sum Scores Culture & Environment Youth | srpf_y_ss_ses                | SRPF School Environment Subscale, Sum                                             | abcd_sscey01.txt |
| <b>Physical health</b>                      |                              |                                                                                   |                  |
| ABCD Sum Scores Physical Health Parent      | sds_p_ss_da                  | Disorder of Arousal (DA) SUM                                                      | abcd_ssphp01.txt |
| ABCD Sum Scores Physical Health Parent      | sds_p_ss_dims                | Disorders of Initiating and Maintaining Sleep (DIMS) SUM                          | abcd_ssphp01.txt |
| ABCD Sum Scores Physical Health Parent      | sds_p_ss_does                | Disorders of Excessive Somnolence (DOES) SUM                                      | abcd_ssphp01.txt |
| ABCD Sum Scores Physical Health Parent      | sds_p_ss_sbd                 | Sleep Breathing disorders (SBD)                                                   | abcd_ssphp01.txt |
| ABCD Sum Scores Physical Health Parent      | sds_p_ss_shy                 | Sleep Hyperhydrosis (SHY) SUM                                                     | abcd_ssphp01.txt |
| ABCD Sum Scores Physical Health Parent      | sds_p_ss_swtd                | Sleep-Wake transition Disorders (SWTD) SUM                                        | abcd_ssphp01.txt |

|                                        |                    |                                      |                  |
|----------------------------------------|--------------------|--------------------------------------|------------------|
| ABCD Sum Scores Physical Health Parent | sds_p_ss_total     | Total Score (Sum of 6 Factors)       | abcd_ssphp01.txt |
| <i>Mobile Technology</i>               |                    |                                      |                  |
| ABCD Sum Scores Mobile Tech Youth      | stq_y_ss_weekday   | Screen Time Youth: Weekday Sum       | abcd_ssmt01.txt  |
| ABCD Sum Scores Mobile Tech Youth      | stq_y_ss_weekend   | Screen Time Youth: Weekend Sum       | abcd_ssmt01.txt  |
| ABCD Sum Scores Mobile Tech Youth      | stq_y_ss_ave_daily | Screen Time Youth: average daily use |                  |

**Table S5:** Associations between PRS<sup>ADHD</sup> and behavioral assessments.  $R^2$  denotes the proportion of the phenotype variance explained by PRS<sup>ADHD</sup>. The assessment of ‘Screen Time Youth: average daily use’ (i.e. `stq_y_ss_ave_daily` in Table S4) is denoted as STU in default in our study.

| Behavior measures                                                       | $\beta$ (se)   | $p$      | $R^2$  | FDR      |
|-------------------------------------------------------------------------|----------------|----------|--------|----------|
| ADHD CBCL DSM5 Scale                                                    | 0.227 (0.042)  | 7.41E-08 | 0.723% | 4.37E-06 |
| Screen Time Youth: average daily use                                    | 0.184 (0.035)  | 2.00E-07 | 0.993% | 5.91E-06 |
| Screen Time Youth: Weekday Sum                                          | 0.178 (0.036)  | 5.27E-07 | 0.927% | 1.04E-05 |
| Screen Time Youth: Weekend Sum                                          | 0.196 (0.043)  | 5.30E-06 | 0.800% | 7.82E-05 |
| Attention Problems CBCL Syndrome Scale                                  | 0.218 (0.049)  | 8.17E-06 | 0.516% | 9.64E-05 |
| Externalizing Problems CBCL Syndrome Scale                              | 0.298 (0.078)  | 1.27E-04 | 0.462% | 1.25E-03 |
| Aggressive Behavior CBCL Syndrome Scale                                 | 0.22 (0.059)   | 1.91E-04 | 0.420% | 1.61E-03 |
| Oppositional Defiant Problems CBCL DSM5 Scale                           | 0.106 (0.029)  | 2.43E-04 | 0.374% | 1.68E-03 |
| UPPS: Lack of Perseverance (GSSF)                                       | 0.12 (0.033)   | 2.56E-04 | 0.359% | 1.68E-03 |
| Total Problems CBCL Syndrome Scale                                      | 0.847 (0.242)  | 4.76E-04 | 0.386% | 2.81E-03 |
| Rule-Breaking Behavior CBCL Syndrome Scale                              | 0.078 (0.024)  | 1.03E-03 | 0.391% | 5.53E-03 |
| NIH Toolbox Oral Reading Recognition Test Age 3+ v2.0                   | -0.275 (0.087) | 1.62E-03 | 0.347% | 7.94E-03 |
| Stress CBCL Scale2007 Scale                                             | 0.138 (0.047)  | 3.25E-03 | 0.252% | 1.41E-02 |
| Conduct Problems CBCL DSM5 Scale                                        | 0.09 (0.031)   | 3.39E-03 | 0.322% | 1.41E-02 |
| BIS/BAS: BAS drive                                                      | 0.122 (0.042)  | 3.58E-03 | 0.217% | 1.41E-02 |
| UPPS-P for Children Short Form (ABCD-version), Negative Urgency         | 0.106 (0.038)  | 4.87E-03 | 0.191% | 1.80E-02 |
| Disorders of Initiating and Maintaining Sleep (DIMS) SUM                | 0.149 (0.054)  | 5.95E-03 | 0.204% | 2.06E-02 |
| UPPS-P for Children Short Form (ABCD-version), Positive Urgency         | 0.108 (0.04)   | 7.08E-03 | 0.259% | 2.27E-02 |
| Crystallized Composite                                                  | -0.227 (0.084) | 7.32E-03 | 0.286% | 2.27E-02 |
| UPPS-P for Children Short Form (ABCD-version), Lack of Planning         | 0.089 (0.034)  | 9.27E-03 | 0.173% | 2.74E-02 |
| Parent General Behavior Inventory SUM                                   | 0.082 (0.033)  | 1.43E-02 | 0.244% | 3.89E-02 |
| Social Problems CBCL Syndrome Scale                                     | 0.077 (0.031)  | 1.45E-02 | 0.237% | 3.89E-02 |
| Parental Monitoring: Mean                                               | -0.015 (0.007) | 2.15E-02 | 0.171% | 5.51E-02 |
| Prodromal Psychosis: Severity Score Sum                                 | 0.301 (0.132)  | 2.27E-02 | 0.204% | 5.58E-02 |
| Cognition Total Composite Score                                         | -0.227 (0.106) | 3.24E-02 | 0.236% | 7.64E-02 |
| Thought Problems CBCL Syndrome Scale                                    | 0.067 (0.032)  | 3.66E-02 | 0.153% | 8.31E-02 |
| SRPF School Disengagement Subscale, Sum                                 | 0.042 (0.021)  | 4.33E-02 | 0.105% | 9.46E-02 |
| Conflict Subscale from the Family Environment Scale Sum of Youth Report | 0.054 (0.028)  | 5.65E-02 | 0.124% | 1.19E-01 |
| Total Score (Sum of 6 Factors)                                          | 0.196 (0.11)   | 7.46E-02 | 0.134% | 1.52E-01 |
| Prosocial Behavior Subscale Mean of Youth Self Report                   | -0.009 (0.005) | 7.91E-02 | 0.045% | 1.56E-01 |
| BIS/BAS: BAS Fun Seeking                                                | 0.066 (0.038)  | 8.51E-02 | 0.088% | 1.56E-01 |
| SRPF School Involvement Subscale, Sum                                   | -0.058 (0.034) | 8.67E-02 | 0.089% | 1.56E-01 |
| Depressive Problems CBCL DSM5 Scale                                     | 0.049 (0.029)  | 8.75E-02 | 0.091% | 1.56E-01 |
| Somatic Problems CBCL DSM5 Scale                                        | 0.036 (0.022)  | 1.05E-01 | 0.095% | 1.82E-01 |
| NIH Toolbox Picture Vocabulary Test Age 3+ v2.0                         | -0.155 (0.099) | 1.18E-01 | 0.134% | 1.95E-01 |
| BIS/BAS: BAS Reward Responsiveness                                      | 0.066 (0.042)  | 1.20E-01 | 0.068% | 1.95E-01 |
| NIH Toolbox Picture Sequence Memory Test Age 8+ Form A v2.0             | -0.265 (0.172) | 1.22E-01 | 0.118% | 1.95E-01 |
| Disorder of Arousal (DA) SUM                                            | -0.018 (0.012) | 1.42E-01 | 0.018% | 2.21E-01 |

|                                                                                   |                |          |        |          |
|-----------------------------------------------------------------------------------|----------------|----------|--------|----------|
| NIH Toolbox List Sorting Working Memory Test Age 7+ v2.0                          | -0.217 (0.154) | 1.60E-01 | 0.140% | 2.43E-01 |
| Somatic Complaints CBCL Syndrome Scale                                            | 0.038 (0.028)  | 1.69E-01 | 0.074% | 2.49E-01 |
| CRPBI - Acceptance Subscale Mean of Report by Secondary Caregiver by youth        | -0.007 (0.006) | 1.82E-01 | 0.062% | 2.56E-01 |
| Anxiety Disorder CBCL DSM5 Scale                                                  | 0.047 (0.036)  | 1.82E-01 | 0.053% | 2.56E-01 |
| Anxious/Depressed CBCL Syndrome Scale                                             | 0.06 (0.046)   | 1.90E-01 | 0.037% | 2.61E-01 |
| Sleep-Wake transition Disorders (SWTD) SUM                                        | 0.048 (0.038)  | 2.05E-01 | 0.061% | 2.74E-01 |
| CRPBI - Acceptance Subscale Mean of Report by Parent Completing Protocol by youth | -0.005 (0.004) | 2.32E-01 | 0.058% | 3.04E-01 |
| Cognition Fluid Composite                                                         | -0.146 (0.134) | 2.74E-01 | 0.101% | 3.51E-01 |
| Internalizing Problems CBCL Syndrome Scale                                        | 0.081 (0.079)  | 3.02E-01 | 0.041% | 3.79E-01 |
| UPPS-P for Children Short Form (ABCD-version), Sensation Seeking                  | 0.037 (0.038)  | 3.25E-01 | 0.005% | 4.00E-01 |
| Sleep Hyperhydrosis (SHY) SUM                                                     | 0.015 (0.017)  | 3.82E-01 | 0.030% | 4.59E-01 |
| Obsessive-Compulsive Problems CBCL Scale2007 Scale                                | 0.023 (0.027)  | 3.89E-01 | 0.024% | 4.59E-01 |
| Withdrawn/Depressed CBCL Syndrome Scale                                           | -0.017 (0.024) | 4.79E-01 | 0.000% | 5.54E-01 |
| NIH Toolbox Dimensional Change Card Sort Test Ages 8-11 v2.0                      | -0.084 (0.121) | 4.88E-01 | 0.040% | 5.54E-01 |
| Sluggish Cognitive Tempo CBCL Scale2007 Scale                                     | 0.008 (0.014)  | 5.82E-01 | 0.031% | 6.48E-01 |
| NIH Toolbox Flanker Inhibitory Control and Attention Test Ages 8-11 v2.0          | 0.059 (0.117)  | 6.14E-01 | 0.001% | 6.71E-01 |
| SRPF School Environment Subscale, Sum                                             | -0.017 (0.04)  | 6.64E-01 | 0.016% | 7.12E-01 |
| BIS/BAS: BIS Sum                                                                  | -0.008 (0.053) | 8.78E-01 | 0.000% | 9.25E-01 |
| Disorders of Excessive Somnolence (DOES) SUM                                      | 0.002 (0.033)  | 9.42E-01 | 0.017% | 9.75E-01 |
| Sleep Breathing disorders (SBD)                                                   | -0.001 (0.015) | 9.65E-01 | 0.004% | 9.82E-01 |
| NIH Toolbox Pattern Comparison Processing Speed Test Age 7+ v2.0                  | 0.002 (0.201)  | 9.91E-01 | 0.003% | 9.91E-01 |

**Table S6:** The white matter tracts (quantified as FA values) significantly associated with PRS<sup>ADHD</sup> (FDR < 0.05).  $R^2$  denotes the proportion of phenotype variance explained by PRS<sup>ADHD</sup>. ‘std\_β’ denotes the standardized coefficient of this DTI measure in the regression analysis.

| DTI measures                                | Connection                                              | std_β  | p        | R <sup>2</sup> |
|---------------------------------------------|---------------------------------------------------------|--------|----------|----------------|
| <i>Global measures</i>                      |                                                         |        |          |                |
| all tract fibers                            |                                                         | -3.459 | 5.48E-04 | 0.33%          |
| L tract fibers                              |                                                         | -3.440 | 5.88E-04 | 0.30%          |
| R tract fibers                              |                                                         | -3.389 | 7.08E-04 | 0.35%          |
| R tract fibers without corpus callosum      |                                                         | -3.290 | 1.01E-03 | 0.32%          |
| L tract fibers without corpus callosum      |                                                         | -3.177 | 1.50E-03 | 0.24%          |
| <i>Regional measures</i>                    |                                                         |        |          |                |
| L uncinate fasciculus                       | inferior frontal lobe & anterior temporal lobe          | -3.517 | 4.41E-04 | 0.19%          |
| R uncinate fasciculus                       | inferior frontal lobe & anterior temporal lobe          | -3.264 | 1.11E-03 | 0.29%          |
| R corticospinal tract or pyramidal tract    | motor cortex & spinal cord                              | -3.141 | 1.70E-03 | 0.32%          |
| L inferior fronto-occipital fasciculus      | occipital lobe & frontal lobe                           | -3.124 | 1.80E-03 | 0.24%          |
| R temporal superior longitudinal fasciculus | temporal lobe & frontal lobe                            | -3.052 | 2.29E-03 | 0.32%          |
| corpus callosum                             | left cortex & right cortex                              | -2.965 | 3.05E-03 | 0.28%          |
| R inferior fronto-occipital fasciculus      | occipital lobe & frontal lobe                           | -2.862 | 4.24E-03 | 0.28%          |
| R superior longitudinal fasciculus          | temporal and parietal lobes & frontal lobe              | -2.693 | 7.12E-03 | 0.28%          |
| L inferior frontal superior frontal tract   | inferior frontal cortex & superior frontal cortex       | -2.637 | 8.39E-03 | 0.22%          |
| L corticospinal tract or pyramidal tract    | motor cortex & spinal cord                              | -2.634 | 8.46E-03 | 0.21%          |
| R inferior frontal superior frontal tract   | inferior frontal cortex & superior frontal cortex       | -2.624 | 8.74E-03 | 0.27%          |
| L anterior thalamic radiations              | thalamus & frontal lobe                                 | -2.534 | 1.13E-02 | 0.09%          |
| R anterior thalamic radiations              | thalamus & frontal lobe                                 | -2.485 | 1.30E-02 | 0.07%          |
| L inferior frontal-striatal tract           | inferior frontal cortex & striatum                      | -2.473 | 1.34E-02 | 0.22%          |
| R parietal superior longitudinal fasciculus | parietal lobe & frontal lobe                            | -2.435 | 1.49E-02 | 0.24%          |
| forceps major                               | left occipital cortex & right occipital cortex          | -2.369 | 1.79E-02 | 0.22%          |
| R cingulum (cingulate)                      | cingulate gyrus & entorhinal cortex (cingulate portion) | -2.311 | 2.09E-02 | 0.13%          |
| R inferior frontal-striatal tract           | inferior frontal cortex & striatum                      | -2.285 | 2.24E-02 | 0.21%          |

**Table S7:** The white matter tracts (quantified as FA values) significantly correlated with STU (FDR < 0.05).  $R^2$  denotes the proportion of phenotype variance explained by this DTI measure. ‘std  $\beta$ ’ denotes the standardized coefficient of this DTI measure in the regression analysis.

| DTI measures                                | Connection                                                    | std $\beta$ | $p$      | $R^2$ |
|---------------------------------------------|---------------------------------------------------------------|-------------|----------|-------|
| <i>Global measures</i>                      |                                                               |             |          |       |
| R tract fibers                              |                                                               | -3.311      | 9.34E-04 | 0.67% |
| all tract fibers                            |                                                               | -3.228      | 1.25E-03 | 0.78% |
| R tract fibers without corpus callosum      |                                                               | -3.226      | 1.26E-03 | 0.71% |
| L tract fibers                              |                                                               | -3.083      | 2.06E-03 | 0.84% |
| L tract fibers without corpus callosum      |                                                               | -2.745      | 6.07E-03 | 0.87% |
| <i>Regional measures</i>                    |                                                               |             |          |       |
| R superior longitudinal fasciculus          | temporal and parietal lobes & frontal lobe                    | -3.661      | 2.53E-04 | 0.47% |
| R parietal superior longitudinal fasciculus | parietal lobe & frontal lobe                                  | -3.598      | 3.23E-04 | 0.45% |
| R temporal superior longitudinal fasciculus | temporal lobe & frontal lobe                                  | -3.541      | 4.01E-04 | 0.49% |
| L fornix                                    | hippocampus & mammillary nuclei of hypothalamus               | -3.538      | 4.05E-04 | 1.26% |
| R fornix                                    | hippocampus & mammillary nuclei of hypothalamus               | -3.278      | 1.05E-03 | 0.95% |
| corpus callosum                             | left cortex & right cortex                                    | -3.139      | 1.70E-03 | 0.46% |
| L parietal superior longitudinal fasciculus | parietal lobe & frontal lobe                                  | -3.070      | 2.15E-03 | 0.85% |
| forceps minor                               | left prefrontal cortex & right prefrontal cortex              | -3.009      | 2.63E-03 | 0.03% |
| L corticospinal tract or pyramidal tract    | motor cortex & spinal cord                                    | -2.999      | 2.72E-03 | 0.38% |
| R uncinate fasciculus                       | inferior frontal lobe & anterior temporal lobe                | -2.835      | 4.60E-03 | 0.09% |
| L superior longitudinal fasciculus          | temporal and parietal lobes & frontal lobe                    | -2.778      | 5.49E-03 | 0.96% |
| R inferior frontal superior frontal tract   | inferior frontal cortex & superior frontal cortex             | -2.762      | 5.75E-03 | 0.92% |
| R corticospinal tract or pyramidal tract    | motor cortex & spinal cord                                    | -2.591      | 9.59E-03 | 0.43% |
| L temporal superior longitudinal fasciculus | temporal lobe & frontal lobe                                  | -2.463      | 1.38E-02 | 0.92% |
| R inferior fronto-occipital fasciculus      | occipital lobe & frontal lobe                                 | -2.431      | 1.51E-02 | 0.12% |
| L inferior frontal-striatal tract           | inferior frontal cortex & striatum                            | -2.177      | 2.95E-02 | 0.06% |
| L anterior thalamic radiations              | thalamus & frontal lobe                                       | -2.153      | 3.14E-02 | 0.18% |
| R superior corticostriate (parietal)        | superior parietal cortex & striatum                           | -2.113      | 3.47E-02 | 0.44% |
| R cingulum (parahippocampal)                | cingulate gyrus & entorhinal cortex (parahippocampal portion) | -2.102      | 3.56E-02 | 0.48% |



**Table S8:** The white matter tracts (quantified as FA values) significantly correlated with the ADHD scale (FDR < 0.05).  $R^2$  denotes the proportion of phenotype variance explained by this DTI measure. ‘std $_{\beta}$ ’ denotes the standardized coefficient of this DTI measure in the regression analysis.

| DTI measures                                | Connection                                                    | std $_{\beta}$ | $p$      | $R^2$ |
|---------------------------------------------|---------------------------------------------------------------|----------------|----------|-------|
| <i>Global measures</i>                      |                                                               |                |          |       |
| L tract fibers without corpus callosum      |                                                               | -5.520         | 3.51E-08 | 0.61% |
| L tract fibers                              |                                                               | -5.269         | 1.41E-07 | 0.61% |
| all tract fibers                            |                                                               | -5.145         | 2.75E-07 | 0.60% |
| R tract fibers                              |                                                               | -4.877         | 1.10E-06 | 0.56% |
| R tract fibers without corpus callosum      |                                                               | -4.806         | 1.57E-06 | 0.49% |
| <i>Regional measures</i>                    |                                                               |                |          |       |
| L uncinate fasciculus                       | inferior frontal lobe & anterior temporal lobe                | -5.672         | 1.47E-08 | 0.31% |
| L inferior fronto-occipital fasciculus      | occipital lobe & frontal lobe                                 | -5.082         | 3.82E-07 | 0.61% |
| L parietal superior longitudinal fasciculus | parietal lobe & frontal lobe                                  | -4.795         | 1.66E-06 | 0.49% |
| R inferior fronto-occipital fasciculus      | occipital lobe & frontal lobe                                 | -4.751         | 2.06E-06 | 0.55% |
| R uncinate fasciculus                       | inferior frontal lobe & anterior temporal lobe                | -4.621         | 3.88E-06 | 0.39% |
| R parietal superior longitudinal fasciculus | parietal lobe & frontal lobe                                  | -4.476         | 7.72E-06 | 0.34% |
| L superior corticostriate                   | superior cortex & striatum                                    | -4.463         | 8.22E-06 | 0.49% |
| L superior corticostriate (parietal)        | superior parietal cortex & striatum                           | -4.406         | 1.07E-05 | 0.48% |
| L superior longitudinal fasciculus          | temporal and parietal lobes & frontal lobe                    | -4.398         | 1.11E-05 | 0.44% |
| L inferior frontal superior frontal tract   | inferior frontal cortex & superior frontal cortex             | -4.341         | 1.44E-05 | 0.57% |
| R superior longitudinal fasciculus          | temporal and parietal lobes & frontal lobe                    | -4.152         | 3.34E-05 | 0.31% |
| L superior corticostriate (frontal)         | superior frontal cortex & striatum                            | -4.152         | 3.34E-05 | 0.40% |
| corpus callosum                             | left cortex & right cortex                                    | -4.136         | 3.58E-05 | 0.45% |
| L temporal superior longitudinal fasciculus | temporal lobe & frontal lobe                                  | -4.055         | 5.07E-05 | 0.40% |
| L corticospinal tract or pyramidal tract    | motor cortex & spinal cord                                    | -3.961         | 7.54E-05 | 0.29% |
| L inferior longitudinal fasciculus          | occipital lobe & temporal lobe                                | -3.831         | 1.29E-04 | 0.39% |
| L inferior frontal-striatal tract           | inferior frontal cortex & striatum                            | -3.606         | 3.13E-04 | 0.30% |
| forceps minor                               | left prefrontal cortex & right prefrontal cortex              | -3.599         | 3.22E-04 | 0.24% |
| R corticospinal tract or pyramidal tract    | motor cortex & spinal cord                                    | -3.451         | 5.62E-04 | 0.29% |
| R superior corticostriate                   | superior cortex & striatum                                    | -3.372         | 7.51E-04 | 0.24% |
| R cingulum (parahippocampal)                | cingulate gyrus & entorhinal cortex (parahippocampal portion) | -3.265         | 1.10E-03 | 0.20% |
| R inferior frontal superior frontal tract   | inferior frontal cortex & superior frontal cortex             | -3.257         | 1.13E-03 | 0.40% |
| R superior corticostriate (frontal)         | superior frontal cortex & striatum                            | -3.254         | 1.14E-03 | 0.22% |
| R inferior frontal-striatal tract           | inferior frontal cortex & striatum                            | -3.248         | 1.17E-03 | 0.24% |
| R cingulum (cingulate)                      | cingulate gyrus & entorhinal cortex (cingulate portion)       | -3.145         | 1.67E-03 | 0.06% |
| forceps major                               | left occipital cortex & right occipital cortex                | -3.132         | 1.75E-03 | 0.21% |
| R superior corticostriate (parietal)        | superior parietal cortex & striatum                           | -3.118         | 1.83E-03 | 0.24% |
| R temporal superior longitudinal fasciculus | temporal lobe & frontal lobe                                  | -3.105         | 1.91E-03 | 0.22% |
| R anterior thalamic radiations              | thalamus & frontal lobe                                       | -3.069         | 2.16E-03 | 0.05% |
| L cingulum (cingulate)                      | cingulate gyrus & entorhinal cortex (cingulate portion)       | -3.010         | 2.62E-03 | 0.06% |
| R inferior longitudinal fasciculus          | occipital lobe & temporal lobe                                | -2.732         | 6.30E-03 | 0.23% |
| L cingulum (parahippocampal)                | cingulate gyrus & entorhinal cortex (parahippocampal portion) | -2.551         | 1.08E-02 | 0.12% |
| L anterior thalamic radiations              | thalamus & frontal lobe                                       | -2.275         | 2.29E-02 | 0.03% |

**Table S9:** Associations between the white matter tracts (quantified as FA values) and the ADHD scale with head motion included as a covariate (ABCD ID: *iqc\_dmri\_1\_mean\_motion*).  $R^2$  denotes the proportion of phenotype variance explained by this DTI measure. ‘ $\text{std}_\beta$ ’ denotes the standardized coefficient of this DTI measure in the regression analysis.

| DTI measures                                | Connection                                                    | $\text{std}_\beta$ | $p$      | $R^2$ | FDR      |
|---------------------------------------------|---------------------------------------------------------------|--------------------|----------|-------|----------|
| <i>Global measures</i>                      |                                                               |                    |          |       |          |
| L tract fibers without corpus callosum      |                                                               | -3.234             | 1.23E-03 | 0.61% | 1.14E-02 |
| L tract fibers                              |                                                               | -2.837             | 4.57E-03 | 0.61% | 2.56E-02 |
| all tract fibers                            |                                                               | -2.630             | 8.56E-03 | 0.60% | 3.89E-02 |
| R tract fibers without corpus callosum      |                                                               | -2.340             | 1.93E-02 | 0.49% | 6.90E-02 |
| R tract fibers                              |                                                               | -2.309             | 2.10E-02 | 0.56% | 7.20E-02 |
| <i>Regional measures</i>                    |                                                               |                    |          |       |          |
| L uncinate fasciculus                       | inferior frontal lobe & anterior temporal lobe                | -3.722             | 1.99E-04 | 0.31% | 7.59E-03 |
| L superior corticostriate (parietal)        | superior parietal cortex & striatum                           | -3.476             | 5.12E-04 | 0.48% | 7.81E-03 |
| L superior corticostriate                   | superior cortex & striatum                                    | -3.417             | 6.36E-04 | 0.49% | 8.39E-03 |
| L inferior fronto-occipital fasciculus      | occipital lobe & frontal lobe                                 | -3.056             | 2.25E-03 | 0.61% | 1.69E-02 |
| L superior corticostriate (frontal)         | superior frontal cortex & striatum                            | -3.035             | 2.41E-03 | 0.40% | 1.69E-02 |
| R inferior fronto-occipital fasciculus      | occipital lobe & frontal lobe                                 | -2.659             | 7.86E-03 | 0.55% | 3.89E-02 |
| R superior corticostriate                   | superior cortex & striatum                                    | -2.641             | 8.29E-03 | 0.24% | 3.89E-02 |
| L parietal superior longitudinal fasciculus | parietal lobe & frontal lobe                                  | -2.539             | 1.11E-02 | 0.49% | 4.68E-02 |
| R superior corticostriate (frontal)         | superior frontal cortex & striatum                            | -2.502             | 1.24E-02 | 0.22% | 5.07E-02 |
| L corticospinal tract or pyramidal tract    | motor cortex & spinal cord                                    | -2.450             | 1.43E-02 | 0.29% | 5.58E-02 |
| R uncinate fasciculus                       | inferior frontal lobe & anterior temporal lobe                | -2.347             | 1.89E-02 | 0.39% | 6.90E-02 |
| R superior corticostriate (parietal)        | superior parietal cortex & striatum                           | -2.283             | 2.25E-02 | 0.24% | 7.55E-02 |
| L superior longitudinal fasciculus          | temporal and parietal lobes & frontal lobe                    | -2.209             | 2.72E-02 | 0.44% | 8.79E-02 |
| R parietal superior longitudinal fasciculus | parietal lobe & frontal lobe                                  | -2.187             | 2.88E-02 | 0.34% | 8.96E-02 |
| L inferior longitudinal fasciculus          | occipital lobe & temporal lobe                                | -2.065             | 3.89E-02 | 0.39% | 1.15E-01 |
| L inferior frontal superior frontal tract   | inferior frontal cortex & superior frontal cortex             | -2.014             | 4.41E-02 | 0.57% | 1.25E-01 |
| L temporal superior longitudinal fasciculus | temporal lobe & frontal lobe                                  | -1.920             | 5.49E-02 | 0.40% | 1.49E-01 |
| R superior longitudinal fasciculus          | temporal and parietal lobes & frontal lobe                    | -1.900             | 5.74E-02 | 0.31% | 1.53E-01 |
| R cingulum (parahippocampal)                | cingulate gyrus & entorhinal cortex (parahippocampal portion) | -1.778             | 7.55E-02 | 0.20% | 1.92E-01 |
| R corticospinal tract or pyramidal tract    | motor cortex & spinal cord                                    | -1.753             | 7.97E-02 | 0.29% | 2.00E-01 |
| R anterior thalamic radiations              | thalamus & frontal lobe                                       | -1.614             | 1.06E-01 | 0.05% | 2.48E-01 |
| corpus callosum                             | left cortex & right cortex                                    | -1.592             | 1.11E-01 | 0.45% | 2.56E-01 |
| forceps major                               | left occipital cortex & right occipital cortex                | -1.469             | 1.42E-01 | 0.21% | 3.04E-01 |
| L inferior frontal-striatal tract           | inferior frontal cortex & striatum                            | -1.454             | 1.46E-01 | 0.30% | 3.04E-01 |
| R inferior frontal-striatal tract           | inferior frontal cortex & striatum                            | -1.439             | 1.50E-01 | 0.24% | 3.04E-01 |
| R cingulum (cingulate)                      | cingulate gyrus & entorhinal cortex (cingulate portion)       | -1.308             | 1.91E-01 | 0.06% | 3.26E-01 |
| forceps minor                               | left prefrontal cortex & right prefrontal cortex              | -1.296             | 1.95E-01 | 0.24% | 3.28E-01 |
| L cingulum (cingulate)                      | cingulate gyrus & entorhinal cortex (cingulate portion)       | -1.041             | 2.98E-01 | 0.06% | 4.39E-01 |
| R temporal superior longitudinal fasciculus | temporal lobe & frontal lobe                                  | -1.024             | 3.06E-01 | 0.22% | 4.43E-01 |
| L cingulum (parahippocampal)                | cingulate gyrus & entorhinal cortex (parahippocampal portion) | -0.956             | 3.39E-01 | 0.12% | 4.75E-01 |
| R inferior frontal superior frontal tract   | inferior frontal cortex & superior frontal cortex             | -0.902             | 3.67E-01 | 0.40% | 5.02E-01 |
| R inferior longitudinal fasciculus          | occipital lobe & temporal lobe                                | -0.844             | 3.99E-01 | 0.23% | 5.31E-01 |
| L anterior thalamic radiations              | thalamus & frontal lobe                                       | -0.755             | 4.50E-01 | 0.03% | 5.74E-01 |
| L fornix                                    | hippocampus & mammillary nuclei of hypothalamus               | -0.590             | 5.55E-01 | 0.10% | 6.62E-01 |
| R fornix                                    | hippocampus & mammillary nuclei of hypothalamus               | -0.124             | 9.01E-01 | 0.03% | 9.29E-01 |

## References

1 Hagler DJ, Ahmadi ME, Kuperman J, Holland D, Dale AM. Automated white-matter tractography using a probabilistic diffusion tensor atlas: Application to temporal lobe epilepsy. *Human Brain Mapping* 2010; **30**(5): 1535-47.
